# Supplementary material
Source: PubMed Central journal article supplement (PMC5787817)
Supplement: supp_RA117.000317_132963_1_supp_22681_wz969j.pdf [file supp_RA117.000317_132963_1_supp_22681_wz969j.pdf]

## Supplemental Figure S1.

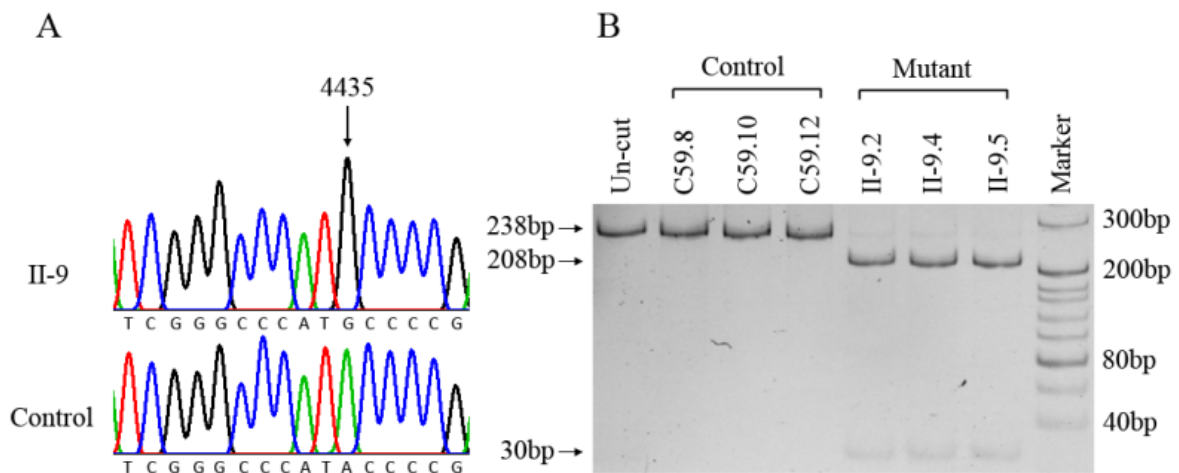

**Supplemental Figure S1. Identification and quantification of m.4435A>G mutation in the tRNA<sup>Met</sup> gene.** (A) Partial sequence electropherograms of the tRNA<sup>Met</sup> gene from the affected individual (II-9) and control subject (C59), respectively. (B) Quantification of the m.4435A>G mutation by PCR-RFLP. PCR products were digested with *NlaIII* and analyzed by electrophoresis in a 3% polyacrylamide gel stained with ethidium bromide. Patients and control cybrids are indicated.

**Supplemental Table S1.** Usage of methionine codons in mitochondrial proteins and the decrease level of mitochondrial proteins in the mutant cell lines related to the average value in the control cell lines

| Proteins | Number of amino acids | Number of methionine codons | Density of methionine codons (%) | Decrease level of mitochondrial proteins (%) |
|----------|-----------------------|-----------------------------|----------------------------------|----------------------------------------------|
| ND3      | 115                   | 8                           | 7.0                              | 58.5                                         |
| ND4      | 459                   | 27                          | 5.9                              | 8.3                                          |
| ND5      | 604                   | 26                          | 4.3                              | 2.5                                          |
| COX2     | 225                   | 10                          | 4.4                              | 22.9                                         |
| CYTB     | 380                   | 15                          | 3.9                              | 70.4                                         |
| ATP6     | 227                   | 12                          | 5.3                              | 49.4                                         |
| ATP8     | 69                    | 6                           | 8.7                              | 5.1                                          |
| ND1      | 318                   | 16                          | 5.0                              | NA                                           |
| ND2      | 347                   | 25                          | 7.2                              | NA                                           |
| ND4L     | 99                    | 10                          | 10.1                             | NA                                           |
| ND6      | 175                   | 10                          | 5.7                              | NA                                           |
| COX1     | 514                   | 32                          | 6.2                              | NA                                           |
| COX3     | 261                   | 11                          | 4.2                              | NA                                           |

NA, not applicable.

**Supplemental Table S2.** mtDNA variants in one Han Chinese hypertensive subject (II-9) and one control subject (C59)

| Gene                     | Position | Replacement        | Conservation (H/B/M/X) <sup>a</sup> | CRS <sup>b</sup> | II-9  | C59   | Previously reported <sup>c</sup> |
|--------------------------|----------|--------------------|-------------------------------------|------------------|-------|-------|----------------------------------|
| D-loop                   | 73       | A to G             |                                     | A                | G     | G     | Yes                              |
|                          | 152      | T to C             |                                     | T                | G     |       | Yes                              |
|                          | 263      | A to G             |                                     | A                | G     | G     | Yes                              |
|                          | 310      | T to CTC           |                                     | T                | CTC   | CTC   | Yes                              |
|                          | 316      | Ins C              |                                     |                  |       | ins C | N                                |
|                          | 489      | T to C             |                                     | T                | C     | C     | Yes                              |
|                          | 16223    | C to T             |                                     | C                | T     | T     | Yes                              |
|                          | 16227    | A to G             |                                     | A                | G     |       | Yes                              |
|                          | 16272    | A to G             |                                     | A                | G     |       | Yes                              |
|                          | 16278    | C to T             |                                     | C                | T     |       | Yes                              |
|                          | 16319    | G to A             |                                     | G                | A     | A     | Yes                              |
|                          | 16362    | T to C             |                                     | T                | C     | C     | Yes                              |
| 16519                    | T to C   |                    | T                                   | C                |       | Yes   |                                  |
| 12S rRNA                 | 709      | G to A             | G/A/A/-                             | G                | A     | A     | Yes                              |
|                          | 750      | A to G             | A/A/A/-                             | A                | G     | G     | Yes                              |
|                          | 1438     | A to G             | A/A/A/G                             | A                | G     | G     | Yes                              |
| 16S rRNA                 | 2706     | A to G             | A/G/A/A                             | A                | G     | G     | Yes                              |
|                          | 3107     | N to del           | N/T/T/T                             | N                | del N | del N | Yes                              |
| tRNA <sup>Met</sup>      | 4435     | A to G             | A/A/A/A                             | A                | G     |       | Yes                              |
| ND2                      | 4769     |                    |                                     | A                | G     | G     | Yes                              |
|                          | 4833     | A to G(Thr to Ala) | T/I/I/L                             | A                | G     | G     | Yes                              |
|                          | 4973     | T to C             |                                     | T                |       | C     | Yes                              |
|                          | 5108     | T to C             |                                     | T                | C     | C     | Yes                              |
| CO1                      | 7028     | C to T             |                                     | C                | T     | T     | Yes                              |
| CO2                      | 7600     | G to A             |                                     | G                | A     |       | Yes                              |
|                          | 8161     | C to T             |                                     | C                |       | T     | Yes                              |
|                          | 8200     | T to C             |                                     | T                |       | C     | Yes                              |
| ATP6                     | 8701     | A to G(Thr to Ala) | T/S/L/Q                             | A                | G     | G     | Yes                              |
|                          | 8860     | A to G(Thr to Ala) | T/A/A/T                             | A                | G     | G     | Yes                              |
| CO3                      | 9377     | A to G             |                                     | A                | G     |       | Yes                              |
|                          | 9540     | T to C             |                                     | T                | C     | C     | Yes                              |
|                          | 9575     | G to A             |                                     | G                | A     |       | Yes                              |
|                          | 9966     | G to A(Val to Ile) | V/V/V/V                             | G                |       | A     | Yes                              |
| ND3                      | 10398    | A to G(Thr to Ala) | T/T/T/A                             | A                | G     | G     | Yes                              |
|                          | 10400    | C to T             |                                     | C                | T     | T     | Yes                              |
| ND4                      | 10873    | T to C             |                                     | T                | C     | C     | Yes                              |
|                          | 11719    | G to A             |                                     | G                | A     | A     | Yes                              |
| tRNA <sup>Leu(CUN)</sup> | 12280    | A to G             | A/G/A/A                             | A                | G     |       | Yes                              |
| ND5                      | 12681    | T to C             |                                     | T                |       | C     | Yes                              |

|      |       |                     |         |   |   |   |     |
|------|-------|---------------------|---------|---|---|---|-----|
|      | 12705 | C to T              |         | C | T | T | Yes |
|      | 13563 | A to G              |         | A | G |   | Yes |
|      | 14034 | T to C              |         | T | C | C | Yes |
| ND6  | 14569 | G to A(Ser to Thr)  | S/S/S/A | G | A | A | Yes |
| CYTB | 14766 | C to T(Thr to Ile)  | T/S/T/S | C | T | T | Yes |
|      | 14783 | T to C              |         | T | C | C | Yes |
|      | 15043 | G to A              |         | G | A | A | Yes |
|      | 15301 | G to A              |         | G | A | A | Yes |
|      | 15323 | G to A(Ala to Thr)  | A/A/A/S | G |   | A | Yes |
|      | 15326 | A to G(Thr to Ala)  | T/M/I/I | A | G | G | Yes |
|      | 15497 | G to A(Gly to Ser ) | G/G/G/G | G |   | A | Yes |

<sup>a</sup>Conservation of amino acid for polypeptides or nucleotide for RNAs in human (H), bovine (B), mouse (M) and *Xenopus laevis* (X).

<sup>b</sup>CRS: Cambridge reference sequence

<sup>c</sup>See the online mitochondrial genome database <http://www.mitomap.org>
